# Supplementary material for: A Survey of Mycoviral Infection in Fusarium spp. Isolated from Maize and Sorghum in Argentina Identifies the First Mycovirus from Fusarium verticillioides
Source: PubMed Central journal article supplement (PMC7602464; doi:10.3390/v12101161), 2020-10-14

Article

# A Survey of Mycoviral Infection in *Fusarium* spp. isolated From Maize and Sorghum in Argentina Identifies the First Mycovirus from *Fusarium verticillioides*

Andrés G. Jacquat, Martín G. Theumer María C. Cañizares, Humberto J. Debat, Juliana Iglesias and María D. García Pedrajas, José S. Dambolena.

## 1. Supplementary Data

1.1. Complete genomic sequence of *Fusarium verticillioides* mitovirus 1 (NCBI-GenBank accession numbers MT506024):

>FvMV1

```
CCATTAGTTAATAATAATCTTGGGAATTTAGTCATTTGACTAAATTGTCCCATAGGACTAAT
GATAATTTCTGTATTATCATTACCATTAAAGAATCGGTTAGAACCCGTATCTCTATGGTTTTA
TCCGTCTGAGTGGTTAGTCAGAATCTGACTAATTTAATCAGGTTGCAGGATAGGGCTTATA
CACCTAAAGTATAGTTTTAATATACCAATATGAAGAAAAATTATACCAAATTTCTTTGAA
GAATAATGGTTTTAATCTTTCCGTCTATTGATACATCAAATAACCTCCGTCCATTATTCAA
ATCATCTTTAAAATGATAAAGAATCATGGAACATTTATACCATCAAGTATTTAAAAGAG
TAAGACTCCACTGTACAAGGTACATTTGTGGAGATCCTCTTTTTACAAATACTATGATGATA
GGAATAGATAAGGAGGGTTGACCAAAAGTTTTCTCATTCTTAAACCATTAGTTAATAATA
ATCTTGAATCATTAAAATTCCTTTTTACCATTCTTAACCTCACAAGAAGTTGAGATTTGTCTA
AAAAGGAATGAGACAAGATAAAACCTGATTATAATAGTATAACAGACAAATCTAAAATGT
CTATTACTATTCCTTCAGGTATTATTAACAAATTTGTTAAGGAATACAGGTTAAAGTCTAAC
CATCCTGAATTTGATAAATTGAAAGATGTTTATCTTTCAACAAAAGCAGGACCAAATGGTC
CAGCTACTTTATCATCTCAGGAAGATCTGTTAAATTTAATTATCCAATGATGGATAAAAATA
TTAAAATTACAGATCAAATGGTATAGATTTCTTCTGTAAAAATTATACTCAAGCATTTAA
CAAAAATATTACTCCAAGTAAAATTAGAACACTTGAAAAATATCTTTTGTTAAGGACCCT
GAATGTAAATTAAGAATAATTGCTATATCTGATTATTATAGCCAATTATATCTTAAACCTAT
ACATAATATTATCATGAATAAACTTCATAATATTACTATGGATAGAACTTATACTCAGGATC
CTCATCATGTTTGAGAAATAAATAATGAGAAATTTTGATCTCTAGACCTTAGTTCAGCAACA
GATAGATTTCTGTAGAATTACAGAAAAGACTTTTAGCTAGAATATTCCATATGGAATTAGC
TCAAAGTTGACAATCTATTCTGAATTCAGAGAGTTCACGACTCCAGAAGGTTACCAGTTA
AAATATGCAACTGGACAACCCATGGGAACGTATTCCTCTTGAAGTGTTCACCTTGACTCA
CCATTTAGTTGTATATTATTGTGCAACTATAAATGGCTACAAGAACTTTGACCAATATATAA
TTCTTGGTGACGATATCGTTATAAAAAATGATAAAGTTGCTAAGACTTATAAAAAGGTCATT
AAAGCTCTGGAGTCGAATTATCTGAAAGTAAAACACATGTATCATCAAATACATATGAAT
TTGCTAAAAGATGAATCAATGAAGTCAAACCGTGAGATAACTGGACTTCCTCTTGGAGG
TATTCTTCGTAATATAAATAATCCTAATATAGTTTTCACTGTATTATACGATTATTTAAAAT
TAAGAAGAATTTTTCCAAGTAGGGCCAATTCCTTAGTAGGATTGGTTAAGGATTTATACC
```

ATAAATTATTATTAATAAATAAATAAAGATTAAACTAAAATAATAAATTATTTTTAGAAA  
 ATCTTTTATAAGCTTAATGATAAAATGGTATCATCTCTAGAGTCATTCTCCTTGATGTTAGA  
 TATAGTCTTTGATTATAAGTCTTACGATAAGTTAAGAACTTATTCGTTAAGAATATTACAA  
 CCTAGACTATAATATTCCAAGTGAAAGTACAATCCTTTCCGAATTGAAAAGGATACTTTCT  
 CATGGACTATCATCAAGAATTTTACAGATGAATAGTAATATAATAAATTCACCTAAAGTCC  
 TAATATCTAAATTTGATATTGAGGACAAGAATTTATTAATACTAACCCGTGTGTTCCCTTTCC  
 ATCTATAACACAATCTCCCGATTTAAAGATATTAAATTTGAAGATCTAGACGATCTTCATAA  
 TATCTCTAAGGAGATATGTGAAATCAATATTGAAAATATTTTTAATAAGGATAGGAACAAG  
 ATCCAATCATTATTAGAAATAGGTAATAATATTGAAAGATGGGTTTAAATATGTCAACAATA  
 CAACTGAAGTGTATTATGGGTCAGCTACATTAAGCGACTCATTACACTTGGTGGTATTGGT  
 AAAATTCTGATGAATAATTTAAAATCATCAGAATTAGACGACATAATTAAGGAACTTACA  
 CTGAGCCACAGCCACAAGGTGGTTATGCTTCAATGTGAGAAAACTTAAGATGTAATCCCT  
 AGACAATGATTGATTAATAATCATTATCTCCACTAACCATAGTGGGGAATCTAGTCAGAAAT  
 GAC

1.2. Complete genomic sequence of *Fusarium andiyazi* mitovirus 1 strain 162 (NCBI-GenBank accession numbers MT506025):

>FaMV1-162

TATCAATTAAGATAGACTCAATAGGTCCAAAGACCATTATACAGTTTAATTTCTGTATAATC  
 TAATGAAAGAAAGGTATAGCAAATCCTTTCTCTTTGGTCTTCCAAGAGTCCATATAATAATG  
 GGTGCTCTTGGATAGCCGAGTGGCTTCTCGTTAAACAGTTAGACGGTAGGACTGCGAGTTA  
 AATACTCGAGTGAACATCCGCAACATTCAAATTTTATAATGTTAAGAAATTATATAAAAAAT  
 AATCAAAAGATTAAGTTTTATATTTTCCCTAACAAATACCATAAGGATGATTTTAATAAAA  
 TGCTGAAATTATATCAACATCTTATTAACATCATAATATATCCGGTGCAATTAATATATG  
 AAAACATACGTTTAATTTGTACAAGATATATTTGTGGTAATCCATTATTAACTAATAATTTT  
 GGAATTGCCACAACCAATGGTTGACCAAATAAACTCTCATTCTTGAAGTCTAGGATTGATA  
 GTAATGAAGTTTATCATACGTTCTTACTCTTCTAATATTTAATAGATCATTAGATCTAAATA  
 AATACGAAGTTAAGAAGAAAATGAAAATCTTGATTATTCATCAATTACTTCTAAACAAAG  
 AATGAATTATACAATACCAACCGTTTTATCAAAGAATTTGTAAAGAAGAATAATCTTTAC  
 ATTTCCAAAGATAAAATGGAGTTTTCCCTGAGTGACATTTATTTATCACAAAAGGAGGAC  
 CACAAGGAAAAGCATCAAATACGGCTTTAGTAAATTTAATAATTATAATTATTATAGTTTA  
 CAAAGACTATTTAATGTCCTTAGTGAGTCCGGTATTGATTTTCAATTTGTAAATCCTATAGTTAT  
 TTTGTGAAAATTCTTCAAATTTAAACCTAAACATAATGATTTAGGAAAGATTGAAGTTGT  
 AAAAGATCCAGAGGGTAAATTCAGATTAATTGCAATAGTTGATTACTATACACAATTAGCT  
 CTAAAGAAACTCCATGATCAGTGTTTTAAGGTTATAAAAAATCTTAAAGAAACTGATAGGA  
 CTTTTACACAAAATCCACATCATAACTGAGAATCTAATCAACATAAGTTTTGATCATTAGAT  
 TTGAGTTCTGCTACGGATAGATTCCCAAGGAACTACAAGCAAGATTACTATCAGAAATGA  
 TAGATATGCATTATGCATGATCTTGAAATAGAATCCTTGAGACAATAAGTTTCCATACAAA  
 GGATGGCAACTCCATTAGATATGAAGTTGGCCAACCTATGGGAACTTATTCCTCCTGAATTT  
 GTTCACTTTAGCTCACACCTAGTAGTTAACTATGCAGCTAAATTAGCTGGTATAGATAAT  
 TTCAACCAATATATCATTCTTGGTGACGATATAGTCATTAAGAATGATAAGGTTGCCTATTA

TTATATACGTATAATAAATAGACTAGGTGTTGATATATCTCTTACAAAAACACATGTATCAG  
AAGATACATATGAATTTGCAAAGAGATGAATAAAGTGTGGAAGAGAAATCACTGGAATAC  
CAGTGAGAGGGATTATCCATAATTTTAAAAATATAAATGTAGTATTTACAATACTATATTCA  
CATTTTAAAATTAATGGTAATACCTATCTTTCAAATAACAGTTTAGTGAATCCCTCCGTAG  
ATTATATAAAGATTTCTATCTCATTAAAGGAAAGAAAAATACTTTCTATACGAAATATG  
AAATCTTATATAAACAGACTTCAAACCTTTAGTAATATATTAGATATAACCTTTGGTTATTCT  
AATGACCAAAGTATCAGACAAATATTCACTAAAAATATTATTAGTGATTATTATATGATAC  
CAACGGCACTAGAGGATAGCCTTCTTGAAATCAAGAAGATCCTTAGTACTGGTCTTGGTAA  
GTTACTAAGTTCCAATGTAGGTAAGTTTCGTTCGTGACAGACGAAAATAATTGAAAATTAT  
GACGATGAAAATCGTAATAATTTAATATATTATCCAACATTTGTTGGGCTTTACAATTACAT  
AAACAATATCAAAACAAGAACAAAAAGATGGAGTGGTTCTGAAGAAATTCAGAATTAAC  
ACAAGATCTTAATGTTATAGATGTTGATAAAGTTTTTCAGTAAGGAAAGATCAAAATTTGAT  
CATCTCCTTACTATAGGAAAAAGTTTAGAAGTAGGTTTCACTAACATCAATAAAACTGATG  
AGATCTATTATGGATCTGCAACAGTTGAATCATCACTGACACCGAAAGGTATGCAGTTATG  
ATTCTCGAAATCTATAACAAAAGATGTTATGGATTCAATTATTGAAGGTAAGTGAGAACCT  
CCAAAACCTCAAATGTCTTATACAGACATGTGAGAGAGCTTGGCTAAGGGAAAGGTATAG  
ACTTGATGGTCTATGACCTCTTGAGCTTGTGTTAATTCACAG

## 2. Supplementary Figure

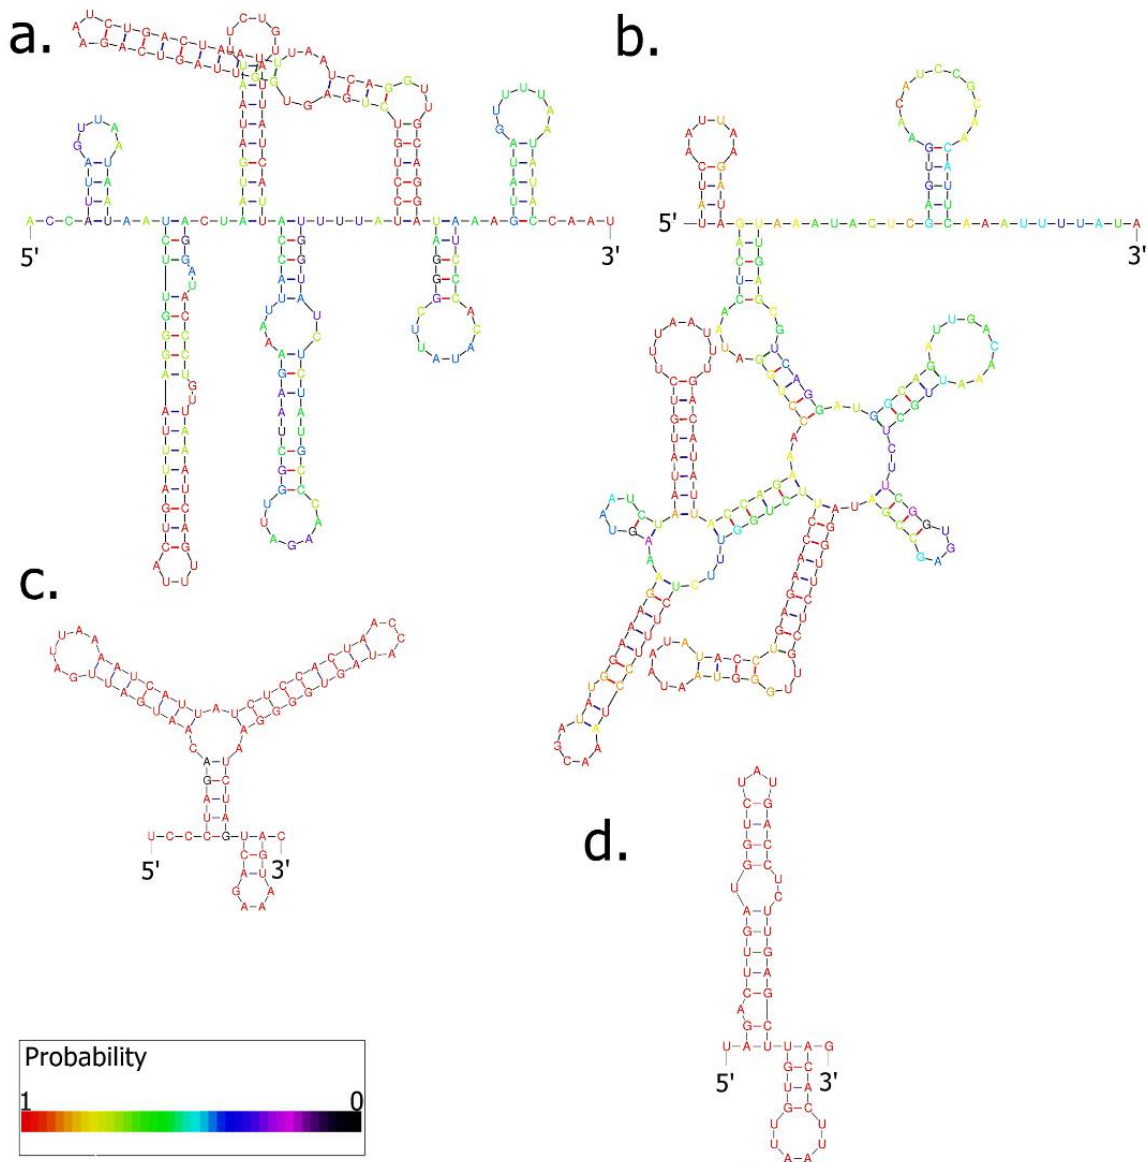

**Figure S1.** Predicted secondary structures (2-D representation of this self-folding) of the terminal untranslated regions (UTR) of FvMV1 and FaMV1-162. Schemes (a) and (c) represent the 5'-UTR and 3'-UTR of FvMV1 with  $dG = -82.52$  and  $dG = -29.55$ , respectively. Schemes (b) and (d) represent the 5'-UTR and 3'-UTR of FaMV1-162 with  $dG = -73.96$  and  $dG = -13.93$ , respectively. The +ssRNA molecules were folded, and the free energy was calculated with the RNA Folding Form V 2.3 Energies (MFOLD) program. For these calculations, the following conditions were sectioned: 25°C, 1M NaCl and 0M divalent ions. The rendering of the structures has been defined with natural angles and annotated using colored base characters, based on p-num information. Colors are ranged from red to black representing the probability as well-determined (1) to poorly determined (0), respectively.

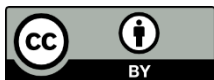

Supplement: viruses-12-01161-s001.pdf [file viruses-12-01161-s001.pdf]
